# Supplementary material
Source: PubMed Central journal article supplement (PMC8855787)
Supplement: aim-olf-L210791-L21-0791_Supplement.pdf [file aim-olf-L210791-L21-0791_Supplement.pdf]

## **Supplementary Material\***

Mackey K, Kansagara D, Vela K. Update alert 9: risks and impact of angiotensin-converting enzyme inhibitors or angiotensin-receptor blockers on SARS-CoV-2 infection in adults. *Ann Intern Med.* 8 February 2022. [Epub ahead of print]. doi:10.7326/L21-0791

**Supplement Table 1. Study Characteristics and Results of Trials on ARB Initiation in COVID-19**

**Supplement Table 2. Quality Assessment of Trials on ARB Initiation in COVID-19**

**Supplement Table 3. Summary of Evidence for ACE/ARB Initiation in COVID-19**

**Supplement Table 4. Planned or In-Progress Trials on ACEI/ARB Initiation in COVID-19 (updated 24 November 2021)**

\* This supplementary material was provided by the authors to give readers further details on their article. The material was reviewed but not copyedited.

**Supplement Table 1. Study Characteristics and Results of Trials on ARB Initiation in COVID-19**

| Study, Country, Period                  | N   | Population                                                                       | Patient Characteristics (demographics for intervention versus comparator)                                                                                               | Intervention and Comparator                                                                                                     | Primary Outcome Results (intervention versus comparator)                                                                                                           | Mortality Results (if mortality was a secondary outcome)                         |
|-----------------------------------------|-----|----------------------------------------------------------------------------------|-------------------------------------------------------------------------------------------------------------------------------------------------------------------------|---------------------------------------------------------------------------------------------------------------------------------|--------------------------------------------------------------------------------------------------------------------------------------------------------------------|----------------------------------------------------------------------------------|
| Duarte (4), Argentina, 5/14/20-10/30/20 | 158 | Adults hospitalized with COVID-19                                                | Mean age: 67 v 64<br>Male: 44 v 63%<br>Race/ethnicity: NR<br>HTN: 44 v 45%<br>DM: 18 v 21%<br>CV disease: NR                                                            | Telmisartan 80 mg twice daily for 14 days compared to standard care                                                             | CRP serum levels expressed as percentage of day 0: at day 5: -57.6 ±56.2% v 5.5 ± 122.2%; at day 8: -73.82 ± 38.41% v 13.9 ± 148.2%                                | 30-day mortality: 3/70 (4%) v 16/71 (23%)<br><br>RR = 0.19 (95% CI [0.06, 0.57]) |
| Geriak (5), US, 3/30/20-7/4/20          | 31  | Adults hospitalized with COVID-19 and mild to moderate hypoxia                   | Mean age: 59 v 55<br>Male: 63 v 60<br>Black/AA: 6 v 0%<br>Hispanic: 75 v 87%<br>Asian: 0 v 0%<br>White: 6 vs 13%<br>HTN: 44 v 33%<br>DM: 19 v 33%<br>CV disease: 6 v 0% | Losartan 12.5mg twice daily for 10 days (with up-titration at the decision of the treating clinician) compared to standard care | Need for ICU transfer: 1/16 (6%) v 2/15 (13%)                                                                                                                      | In-hospital mortality: 1/16 (6%) vs 1/15 (7%)                                    |
| Nouri-Vaskeh (6), Iran, 4/2/20-6/30/20  | 80  | Adults hospitalized with COVID-19 and HTN                                        | Mean age: 67 v 60<br>Male: 54 v 46<br>Race/ethnicity: NR<br>HTN: 100% (inclusion criteria)<br>DM: 11 v 8%<br>CV disease: 8 v 7%                                         | Losartan 25mg twice daily compared to amlodipine 5mg daily for at least 14 days                                                 | 30-day mortality: 2/41 (5%) v 5/39 (13%), <i>p</i> = .241                                                                                                          | NA                                                                               |
| Puskarich (7), US, 4/1/20-11/30/20      | 117 | Adults presenting for SARS-CoV-2 PCR testing and found to have a positive result | Mean age: 38 v 37<br>Male: 43 v 58<br>Black/AA: 7 v 7%<br>Hispanic: 9 v 9%<br>Asian: 2 v 9%<br>White: 78 v 66%<br>HTN: 10 v 5%<br>DM: 7 v 5%<br>CV disease: 0 v 0%      | Losartan 25mg twice daily (adjusted for renal function if needed) for 10 days v placebo                                         | All-cause hospitalization at or before day 15: 3/58 (5%) v 1/59 (2%)<br><br>Absolute difference of -3.5% (95% CI [-13.2, 4.8%]; <i>p</i> = 0.320) favoring placebo | No deaths among study participants                                               |

Abbreviations: CV=Cardiovascular disease; DM=Diabetes mellitus; HTN=Hypertension; N=Number of participants; NA=Not applicable; NR=NR

**Supplement Table 2. Quality Assessment of Trials on ARB Initiation in COVID-19**

| <b>Study</b> | <b>Risk of bias from randomization process</b>                                                                                                                                                                        | <b>Risk of bias from deviation from intended interventions (assignment)</b>                                                                                                                                                  | <b>Risk of bias from deviation from intended interventions (adherence)</b>                                                                                                   | <b>Risk of bias from missing outcome data</b>               | <b>Risk of bias in measurement of the outcome</b>                                                                                          | <b>Risk of bias in selection of the reported result</b>                                                | <b>Overall Risk of Bias</b> |
|--------------|-----------------------------------------------------------------------------------------------------------------------------------------------------------------------------------------------------------------------|------------------------------------------------------------------------------------------------------------------------------------------------------------------------------------------------------------------------------|------------------------------------------------------------------------------------------------------------------------------------------------------------------------------|-------------------------------------------------------------|--------------------------------------------------------------------------------------------------------------------------------------------|--------------------------------------------------------------------------------------------------------|-----------------------------|
| Duarte (4)   | High<br>Allocation sequence was random but unclear if the sequence was concealed appropriately. Baseline differences in % male, % obese, and CRP levels raise concern about a problem with the randomization process. | Some concerns<br>Open label design in which participants and carers were aware of group. One patient in the intervention group did not receive the intervention after randomization. Study used intention-to-treat analysis. | Low<br>Open label design in which participants and carers were aware of group. Deviations from intended interventions were balanced. Study used intention-to-treat analysis. | Low<br>Primary outcome data available for all participants. | Low<br>Open label design but awareness of group assignment would not have affected laboratory data or other data obtained by chart review. | High<br>Study endpoints and some secondary outcomes were changed during the study period.              | High                        |
| Geriak (5)   | Some concerns<br>The allocation sequence and whether it was concealed were not reported. Baseline differences between groups do not suggest a problem with randomization.                                             | Some concerns<br>Open label design in which participants and carers were aware of group. One patient in the intervention group did not receive the intervention after randomization. Study used intention-to-treat analysis. | Low<br>Open label design in which participants and carers were aware of group. No reported deviations from intended interventions. Study used intention-to-treat analysis.   | Low<br>Primary outcome data available for all participants. | Low<br>Open label design but awareness of group assignment would not have affected laboratory data or other data obtained by chart review. | Low<br>Results were reported for all participants in concordance with the pre-specified analysis plan. | Some concerns               |

|                  |                                                                                                                                                                                                                                                     |                                                                                                                                                             |                                                                                                                                                                                                                                                     |                                                                                                                       |                                                                                                                                                                                                        |                                                                                                        |               |
|------------------|-----------------------------------------------------------------------------------------------------------------------------------------------------------------------------------------------------------------------------------------------------|-------------------------------------------------------------------------------------------------------------------------------------------------------------|-----------------------------------------------------------------------------------------------------------------------------------------------------------------------------------------------------------------------------------------------------|-----------------------------------------------------------------------------------------------------------------------|--------------------------------------------------------------------------------------------------------------------------------------------------------------------------------------------------------|--------------------------------------------------------------------------------------------------------|---------------|
| Nouri-Vaskeh (6) | Some concerns<br>Block randomization process with use of computer-generated random number. Allocation sequence was concealed. Baseline differences in participant age between groups raises concern about a problem with the randomization process. | Low<br>Participants and carers were probably blinded to group allocation, but blinding is not well-described. No apparent deviations from group assignment. | Some concerns<br>Participants and carers were probably blinded to group allocation, but blinding is not well-described. Two patients in the comparator group were lost to follow-up and it is unclear whether they received the intended treatment. | Some concerns<br>Two patients in the comparator group were lost to follow-up and were not included in final analyses. | Low<br>Participants and carers were probably blinded to group allocation but regardless, awareness of group assignment would not have affected laboratory data or other data obtained by chart review. | Low                                                                                                    | Some concerns |
| Puskarich (7)    | Some concerns<br>Block randomization process. Allocation sequence was concealed. A higher percent of males assigned to the comparator group. Otherwise, baseline differences between groups do not suggest a problem with randomization.            | Low<br>Double-blinded study. No apparent deviations from group assignment.                                                                                  | Low<br>Double-blinded study. Deviations from intended interventions were balanced. Study used intention-to-treat analysis.                                                                                                                          | Low<br>Missing data are reported, and the study assessed the potential for bias due to missing data.                  | Low<br>Double-blinded study. Data obtained by chart review.                                                                                                                                            | Low<br>Results were reported for all participants in concordance with the pre-specified analysis plan. | Low           |

**Supplement Table 3. Summary of Evidence for ACE/ARB Initiation in COVID-19**

| <b>Outcome</b>  | <b>Population</b>                     | <b>SOE</b>   | <b>No. Studies (N)<br/>Study Design</b> | <b>Study<br/>Limitations</b>         | <b>Directness</b> | <b>Consistency</b> | <b>Precision</b> | <b>Finding</b>                                                                                                                                                                      |
|-----------------|---------------------------------------|--------------|-----------------------------------------|--------------------------------------|-------------------|--------------------|------------------|-------------------------------------------------------------------------------------------------------------------------------------------------------------------------------------|
| Mortality       | Hospitalized adults with COVID-19     | Insufficient | 3 RCTs                                  | High (1 RCT); Some concerns (2 RCTs) | Direct            | Inconsistent       | Imprecise        | 1 RCT found a reduced mortality risk with telmisartan compared to usual care (RR = 0.19; 95% CI [0.06, 0.57]). 2 RCTs found no difference.                                          |
| Hospitalization | Non-hospitalized adults with COVID-19 | Insufficient | 1 RCT                                   | Low                                  | Direct            | Not applicable     | Precise          | 1 RCT found that losartan compared to placebo did not reduce hospitalization risk (absolute difference in all-cause hospitalization between groups was -3.5% favoring the placebo). |

**Supplement Table 4. Planned or In-Progress Trials on ACEI/ARB Initiation in COVID-19 (updated 24 November 2021)**

| Study Title                                                                                                                              | NCT Identifier | Sponsor                                         | Intervention                                    | Primary Outcome(s)                                                            | Enrollment       | Status                                            | Estimated Completion Date |
|------------------------------------------------------------------------------------------------------------------------------------------|----------------|-------------------------------------------------|-------------------------------------------------|-------------------------------------------------------------------------------|------------------|---------------------------------------------------|---------------------------|
| Randomized Controlled Trial of Losartan for Patients With COVID-19 Requiring Hospitalization. (8)                                        | NCT04312009    | University of Minnesota, US                     | Losartan compared to placebo                    | Difference in Estimated (PEEP adjusted) P/F Ratio at 7 days                   | 205 (Actual)     | Completed; last update posted August 2021         | NA                        |
| Efficacy of Captopril Nebulization in COVID-19 Patients Suffering of SARS CoV-2 Pneumonia. A Randomized Phase II Study (CAPTOCOVID) (9)  | NCT04355429    | Assistance Publique - Hôpitaux de Paris, France | Nebulized captopril compared to standard care   | 14-day ventilation free survival                                              | 230 (Estimated)  | Not yet recruiting; last update posted April 2020 | August 2020               |
| <b>Telmisartan in Respiratory Failure Due to COVID-19 (STAR-COVID) (10)</b>                                                              | NCT04510662    | Abraham Edgar Gracia-Ramos, Mexico              | Telmisartan 40mg compared to standard care      | 30-day mortality and mechanical ventilation at 14 days                        | 60 (Estimated)   | Recruiting; last update posted August 2020        | April 2021                |
| <b>Ramipril for the Treatment of COVID-19 (RAMIC) (11)</b>                                                                               | NCT04366050    | University of California, San Diego, US         | Ramipril 2.5mg orally daily compared to placebo | Composite of mortality or need for ICU admission or ventilator use at 14 days | 560 (Estimated)  | Recruiting, last update posted January 2021       | May 2021                  |
| <b>Host Response Mediators in Coronavirus (COVID-19) Infection - Is There a Protective Effect of Losartan on Outcomes of Coronavirus</b> | NCT04606563    | University of British Columbia, Canada          | Losartan (25-100mg) compared to usual care      | 28-day mortality                                                              | 1372 (Estimated) | Recruiting; last update posted October 2020       | June 2021                 |

|                                                                                                                                                           |             |                                                     |                                      |                                                                                                                          |                  |                                                         |               |
|-----------------------------------------------------------------------------------------------------------------------------------------------------------|-------------|-----------------------------------------------------|--------------------------------------|--------------------------------------------------------------------------------------------------------------------------|------------------|---------------------------------------------------------|---------------|
| <b>Infection? (ARBs CORONA II) (12)</b>                                                                                                                   |             |                                                     |                                      |                                                                                                                          |                  |                                                         |               |
| <b>Pilot Clinical Trial of the Safety and Efficacy of Telmisartan for the Mitigation of Pulmonary and Cardiac Complications in COVID-19 Patients (13)</b> | NCT04360551 | University of Hawaii, US                            | Telmisartan 40mg compared to placebo | Maximum clinical severity of disease                                                                                     | 40 (Estimated)   | Recruiting; last update posted August 2020              | June 2021     |
| <b>COVID MED Trial - Comparison of Therapeutics for Hospitalized Patients Infected With COVID-19 (COVIDMED) (14)</b>                                      | NCT04328012 | Bassett Healthcare, New York, US                    | Losartan compared to placebo         | National Institute of Allergy and Infectious Diseases COVID-19 Ordinal Severity Scale (NCOSS)                            | 100 (Estimated)  | Recruiting; last update posted February 2021            | August 2021   |
| <b>CLARITY Controlled evaluation of Angiotensin Receptor blockers for COVID-19 respiratory disease (15)</b>                                               | NCT04394117 | The George Institute, Australia                     | ARB (any) compared to placebo        | 7-Point National Institute of Health Clinical Health Score                                                               | 1500 (Estimated) | Active, not recruiting; last update posted October 2021 | January 2022  |
| <b>Evaluation of the Potential Benefit of Renin-angiotensin System Inhibitors (RASi, ACEi/ARB) in High-risk Patients With COVID-19. (COVID-RASi) (16)</b> | NCT04591210 | Ottawa Heart Institute Research Corporation, Canada | ACEi or ARB compared to usual care   | Death, mechanical ventilation, ICU admission, and major adverse cardiac events within the first 28 days of randomization | 1155 (Estimated) | Recruiting; last update posted June 2021                | December 2022 |
| <b>INvestigating TELmisartin Study (INTEL) (17)</b>                                                                                                       | NCT04715763 | University of Hawaii, US                            | Telmisartan 40mg compared to placebo | Duration of hospitalization                                                                                              | 40 (Estimated)   | Recruiting; last update posted September 2021           | December 2022 |

|                                                                        |             |                         |                                                                         |                                          |                |                                                   |               |
|------------------------------------------------------------------------|-------------|-------------------------|-------------------------------------------------------------------------|------------------------------------------|----------------|---------------------------------------------------|---------------|
| Angiotensin Converting Enzyme Inhibitors in Treatment of Covid 19 (18) | NCT04345406 | Tanta University, Egypt | ACEIs with conventional treatment for COVID19 compared to standard care | Number of patients with virological cure | 60 (Estimated) | Not yet recruiting; last update posted April 2020 | December 2029 |
|------------------------------------------------------------------------|-------------|-------------------------|-------------------------------------------------------------------------|------------------------------------------|----------------|---------------------------------------------------|---------------|
